# Supplementary material for: pH-sensitive polymeric micelles for the Co-delivery of proapoptotic peptide and anticancer drug for synergistic cancer therapy
Source: Royal Society of Chemistry journal article supplement (doi:10.1039/c6ra27054a), 2017-01-01
Supplement: c6ra27054a1.pdf [file c6ra27054a1.pdf]

## Supporting Information

### **pH-Sensitive Polymeric Micelles for Co-delivery of Proapoptotic Peptide and Anticancer Drug for Synergistic Cancer Therapy**

Anbu Mozhi,<sup>†,‡,a</sup> Israr Ahmad,<sup>‡,a</sup> Chukwunweike Ikechukwu Okeke,<sup>†,‡,a</sup> Chan Li,<sup>\*,†,‡,a</sup> Xing-Jie Liang<sup>\*,†,‡,a</sup>

<sup>†</sup>Laboratory of Controllable Nanopharmaceuticals, Chinese Academy of Sciences (CAS), Zhongguancun, Beijing 100190, China

<sup>‡</sup>Key laboratory for Biomedical Effects of Nanomaterials and Nanosafety, National Center for Nanoscience and Technology, No. 11, First North Road, Zhongguancun, Beijing 100190, China

<sup>a</sup>University of Chinese Academy of Sciences, Beijing 100049, China

Corresponding author: Tel; +86-010-82545569; Fax: +86-010-62656765

E-mails: lic@nanoctr.cn, liangxj@nanoctr.cn

(A)

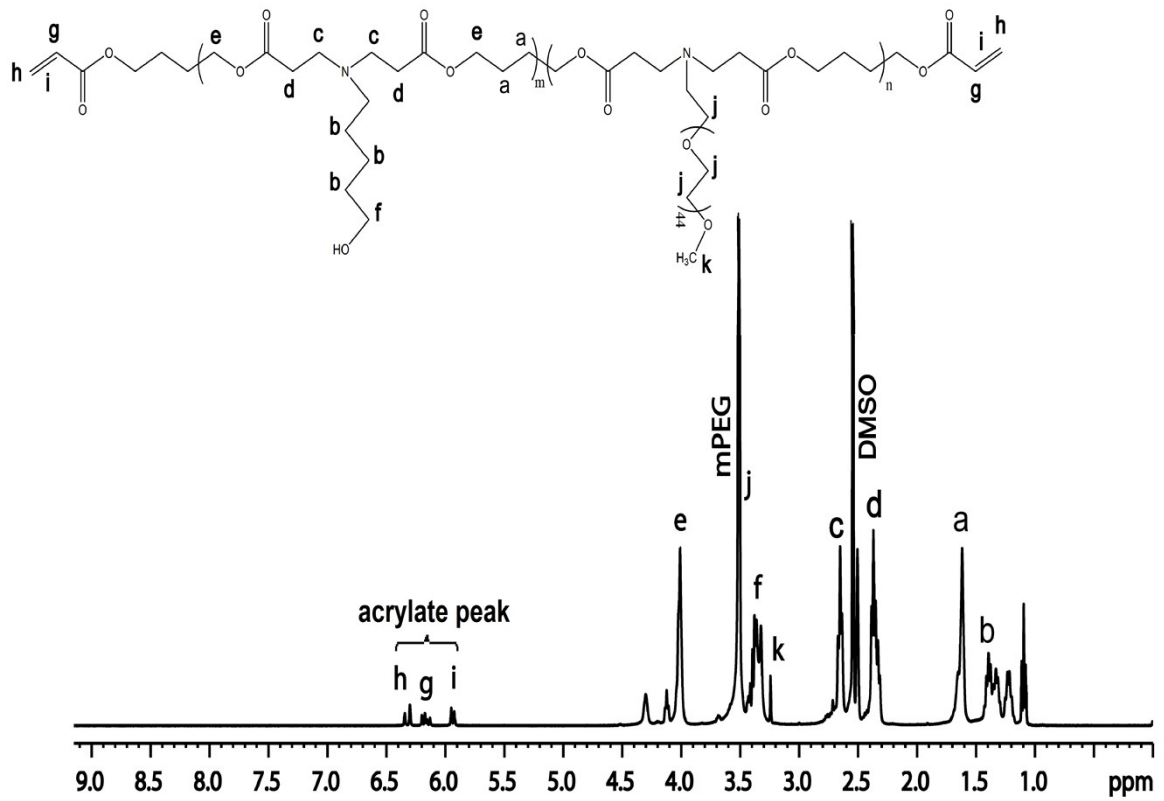

(B)

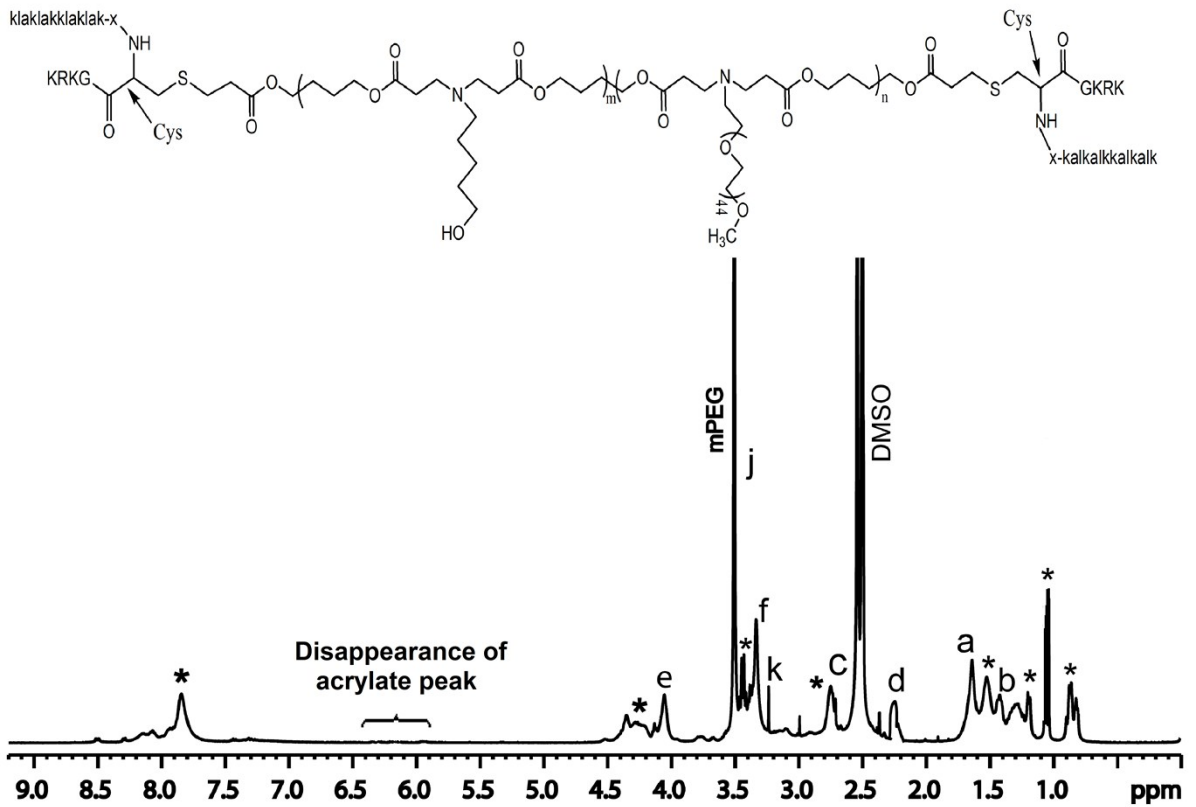

(C)

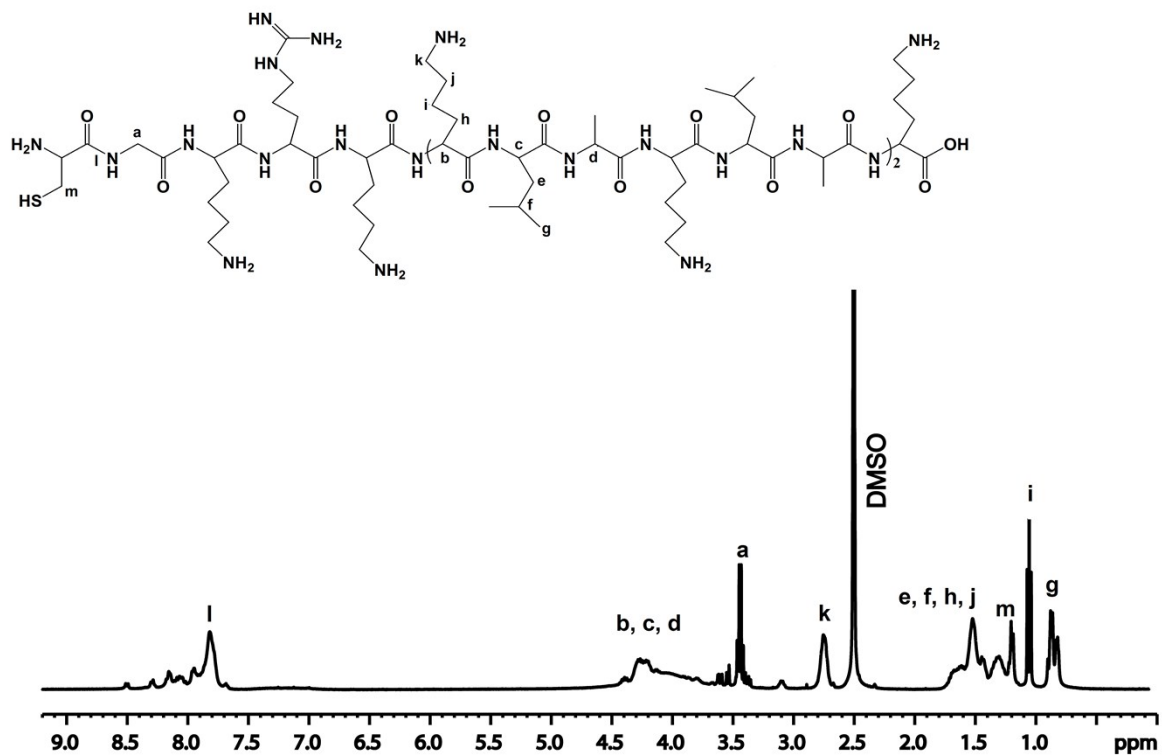

**Fig. S1** <sup>1</sup>H NMR spectra of (A) PBAE-PEG, (B) CGKRRK<sub>D</sub>(KLAKLAK)<sub>2</sub>-conjugated PBAE-PEG copolymer and (C) free CGKRRK<sub>D</sub>(KLAKLAK)<sub>2</sub>. Spectra were recorded in DMSO-d<sub>6</sub>. The therapeutic peptide signals in B are denoted by asterisks (\*) symbols.

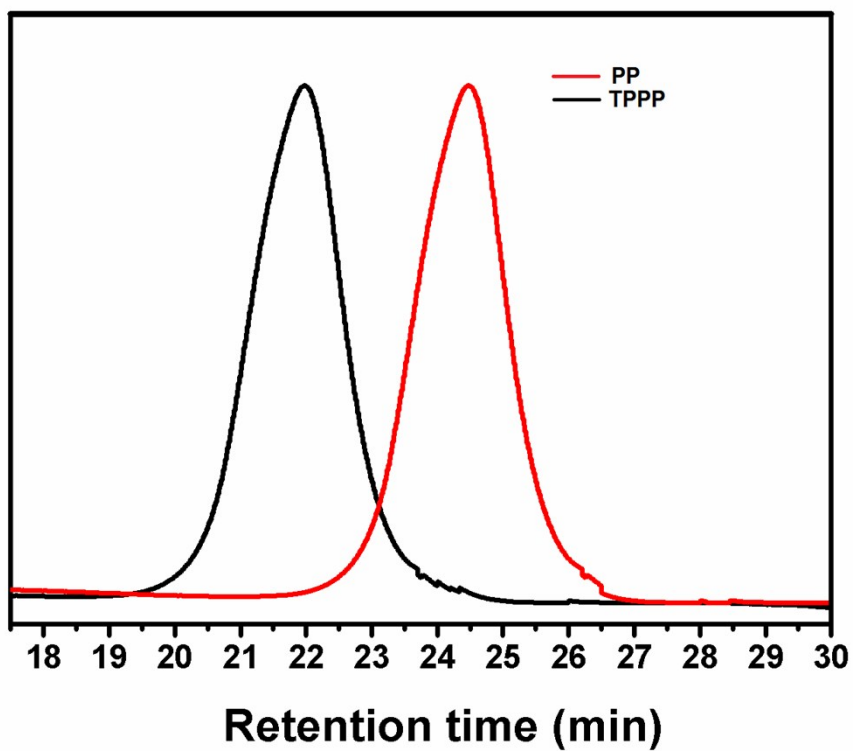

**Fig. S2** GPC traces of PP (PBAE-PEG) and TPPP ((CGKRRK<sub>D</sub>(KLAKLAK)<sub>2</sub>-PBAE-PEG) determined by DMF based gel permeation chromatography.

**Table S1** Physicochemical characterization of CGKRR<sub>D</sub>(KLAKLAK)<sub>2</sub>-conjugated PBAE-PEG copolymer.

| <b>Sample</b> | <b>Feed ratio</b>            | <b>Mn<sup>a</sup></b><br><b>(g/mol)</b> | <b>PDI<sup>a</sup></b> | <b>CMC<sup>b</sup></b><br><b>(mg/mL)</b> |
|---------------|------------------------------|-----------------------------------------|------------------------|------------------------------------------|
| <b>PP</b>     | BD: AP: PEG<br>(1.2:0.9:0.1) | 4092                                    | 1.4                    | 0.01                                     |
| <b>TP</b>     | -                            | 2097                                    | -                      | -                                        |
| <b>TPPP</b>   | PP: TP<br>(1:2.2)            | 8286                                    | 1.02                   | 0.04                                     |

<sup>a</sup>Molecular weight of the polymer was determined by GPC measurements. PDI = Mw/Mn.

<sup>b</sup>CMC was determined using pyrene as a fluorescence probe. Abbreviation: PP = PBAE-PEG, TP = CGKRR<sub>D</sub>(KLAKLAK)<sub>2</sub>, TPPP = CGKRR<sub>D</sub>(KLAKLAK)<sub>2</sub>-PBAE-PEG.

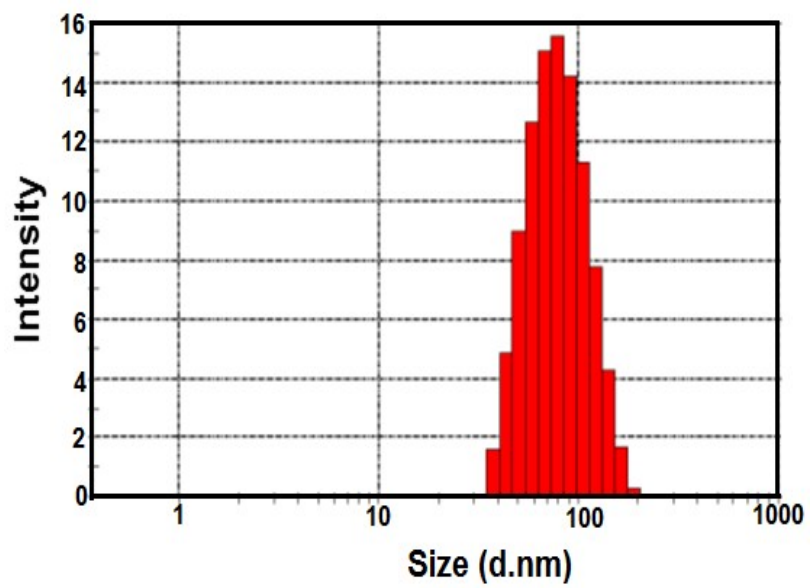

**Fig. S3** The diameter and size distribution of DTX-loaded PP micelles measured by DLS.

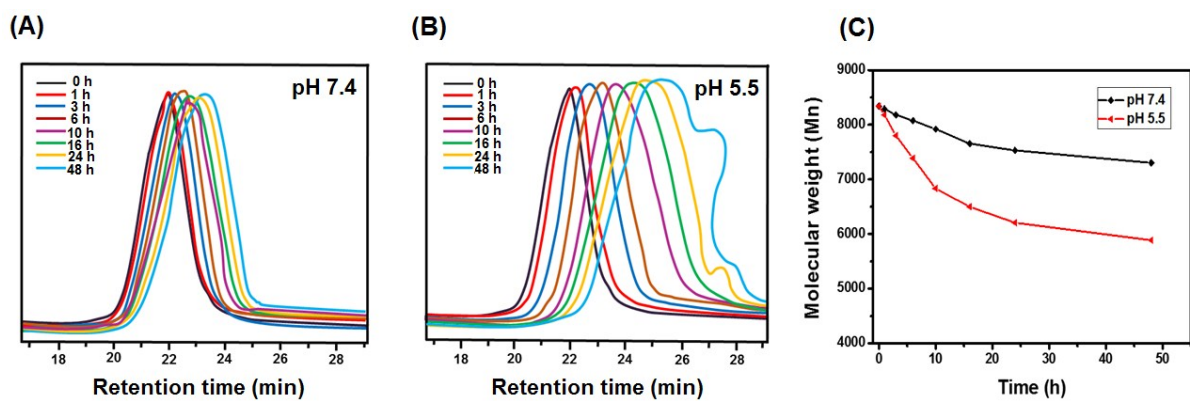

**Fig. S4** The GPC traces of time-dependent hydrolysis of TPPP at (A) pH 7.4 and (B) pH 5.5. (C) Determination of molecular weight changes of TPPP copolymer based on time-dependent hydrolysis *via* GPC analysis.

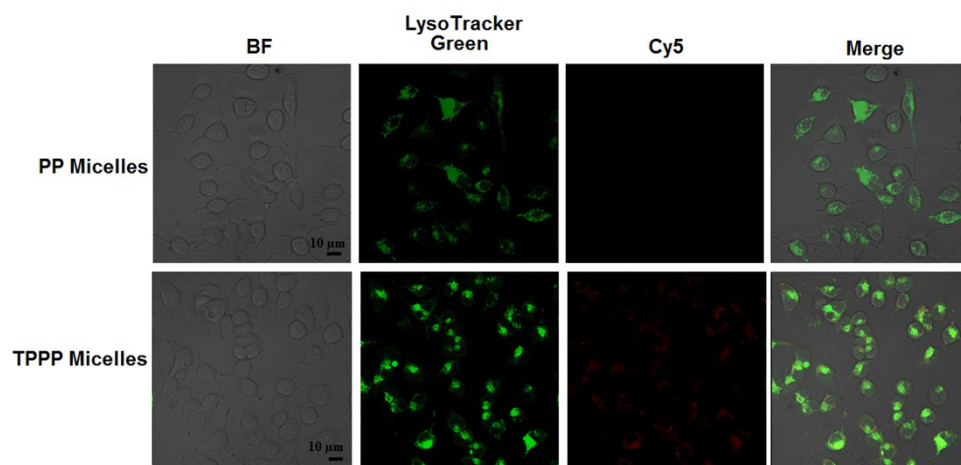

**Fig. S5** Confocal images of MCF-7 cells treated with Cy5-loaded PP and Cy5-loaded TPPP micelles (1 h). Lysosomes were labelled with LysoTracker for 15-20 min. Red and green colors denote Cy5 and LysoTracker respectively.



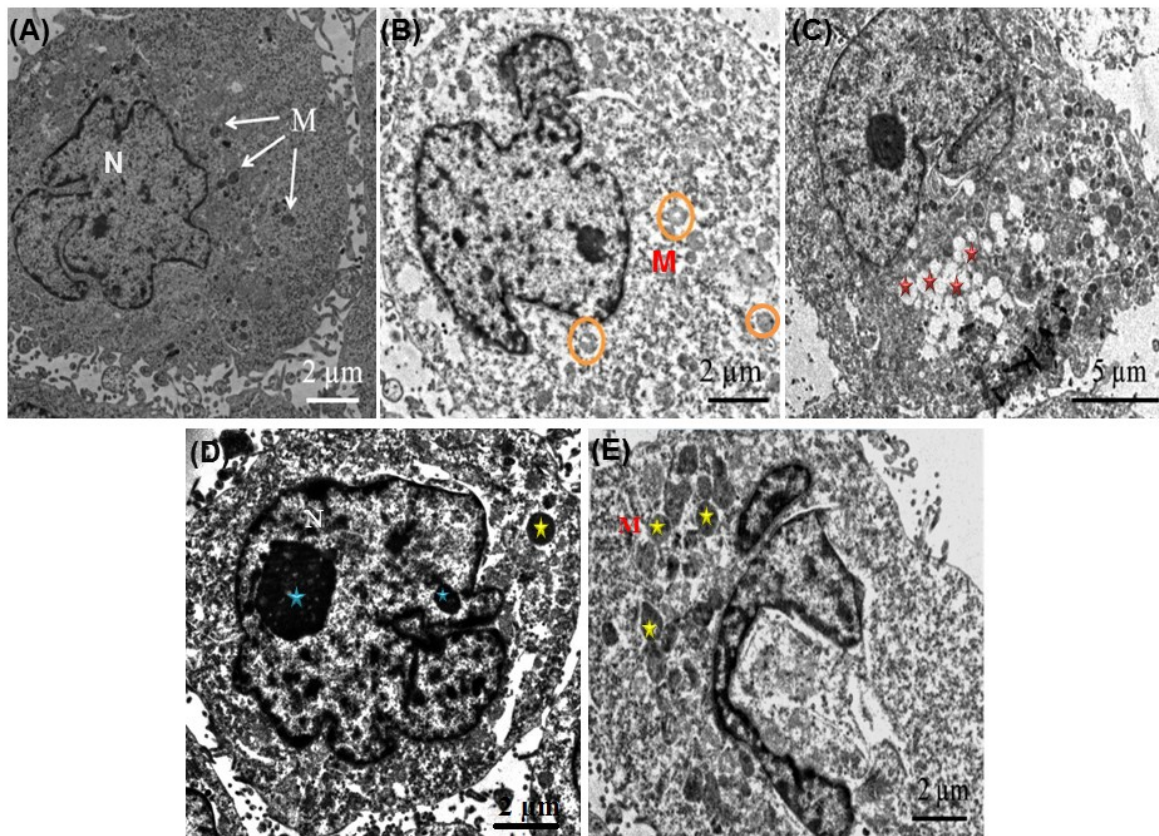

**Fig. S6** BIO-TEM images of (A) MCF-7 cells incubated for 36 h with empty PP micelles and (B, C, D, and E) MCF-7 cells incubated with DTX-loaded TPPP micelles. Mitochondria (M) were highlighted by enlarged orange circle and yellow stars. Nucleus (N) was indicated by blue stars. Red stars show large vacuoles.
